# Supplementary material for: A non-disruptive and efficient knock-in approach allows fate tracing of resident osteoblast progenitors during repair of vertebral lesions in medaka
Source: Oxford University Press journal article supplement (doi:10.1242/dev.200238), 2022-05-20
Supplement: dev200238supp.pdf [file dev200238supp.pdf]

**Table S1. List of primers.**

| Purpose                                          | Primer            |                                                        |
|--------------------------------------------------|-------------------|--------------------------------------------------------|
|                                                  | Name              | Sequence (5' – 3')                                     |
| Cloning of <i>col10a1</i> knock-in donor plasmid | Mbait9bp_FP       | TTACGCCAGTCGACCACCTCTG                                 |
|                                                  | Cre_pA_RP         | CCCCACTTTGTACAAGATCAAGCTGTGGCAGGG AAAC                 |
|                                                  | Cre_pA_FP         | TCCCTGCCACAGCTTGATCTTGACAAAAGTGGGGGAT                  |
|                                                  | Cmlc_HA2_RP       | GATGCGTGATCAACCTAAAAGCTTAAATCAGTTGTGT                  |
|                                                  | Cmlc_HA2_FP       | CAACTGATTTAAGCTTTTAGGTTGATCACGCATCAGG                  |
|                                                  | Mbait2bp_RP       | AGCGCGCAATTAACCCTCACTCC                                |
|                                                  | P2A_Cre_FP1       | CCCTGGACCTATGTCCAATTTACTAACCCTACACCA                   |
|                                                  | stopHA2_Cre_RP1   | GTGATCAACCTATCAAGCTGTGGCAGGGAAAACCTCT                  |
|                                                  | P2a_HA1_RP1       | AGTTTGTAGCCGTTGAAGCGATGAGAAAACCG                       |
|                                                  | Cre_stop_HA2_FP1  | GCCACAGCTTGATAGGTTGATCACGCATCAGGTTTC                   |
|                                                  | HA1_p2a_FP1       | CTCATCGCTTCAACGGCTACAACTTCAGCCTGCTG                    |
|                                                  | Mbait_cre_FP      | CCCCCCCACCTCTGGAACCGCAGCAGCCATGTC<br>CAATTTACTAACCCTCA |
|                                                  | PolyA_mbait_RP    | CCCCCCCACCTCTGGAACCGCAGCAGCCAAAA<br>AACCTCCCACACCTCC   |
|                                                  | HR_cre_mbait_RP   | GTGGCGTCGACTGTATCTCCCTATGGGGTGAAA<br>CAGCAGA           |
|                                                  | HR_polyA_mbait_FP | GTGTGGGAGGTTTTTTGGTGGGAGCACTTTTTT<br>GCCGTTCC          |
| Cloning of <i>col2a1a</i> knock-in donor plasmid | c2o1_mbait_FP1    | TTACGCCAGTCGACCACCTC                                   |
|                                                  | mbait_c2HA1_RP1   | GGTTTCCTGTGGCCGGGCTATGGGGTGAAACAGC                     |
|                                                  | mbait_c2HA1_FP1   | GTTTCACCCCATAGCCCGCCACAGGAAACCTGAAGA                   |
|                                                  | c2HA1_p2a_RP1     | GGCTGAAGTTTGTAGCCAAAAAGCAGACGGGGCCTATGT                |
|                                                  | c2HA1_p2a_FP1     | GCCCCGTCTGCTTTTTGGCTACAACTTCAGCCTGCTGA                 |
|                                                  | cmlc2_c2HA2_RP1   | GTTGCAATACTCAACTAAAGCTTAAATCAGTTGTGT                   |
|                                                  | cmlc2_c2HA2_FP1   | AACTGATTTAAGCTTTAGTTGAGTATTGCAACGGCCC                  |
|                                                  | c2HA2_mbait_RP1   | ACGGCAAAAAAGTGCTCTATTGCCGGTGCCCTTAAGT                  |
|                                                  | c2HA2_mbait_FP1   | AGGGCACCGGCAATAGAGCACTTTTTTGCCGTTCC                    |
|                                                  | c2o1_mbait_RP1    | CAAGCTATGCATCAAGCTTGGTACCCTC                           |
| Cloning of <i>osr1</i> knock-in donor plasmid    | c2o1_mbait_FP1    | TTACGCCAGTCGACCACCTC                                   |
|                                                  | mbait_o1HA1_RP1   | AAAAATGGCTGAGGGCTATGGGGTGAAACAGC                       |
|                                                  | mbait_o1HA1_FP1   | TTTCACCCCATAGCCCTCAGCCATTTTTAGCGG                      |
|                                                  | o1HA1_p2a_RP1     | GCTGAAGTTTGTAGCCTTGACCTTGGCTGGCTT                      |
|                                                  | o1HA1_p2a_FP1     | CCAGCCAAGGTCAAGGCTACAACTTCAGCCT                        |
|                                                  | cmlc2_o1HA2_RP1   | TGTCCCGTCTGCTTGACAAAGCTTAAATCAGTTGTG                   |
|                                                  | cmlc2_o1HA2_FP1   | AACTGATTTAAGCTTTGTCAAGCGACCGGGACT                      |

|                                                                     |                                          |                                                                     |
|---------------------------------------------------------------------|------------------------------------------|---------------------------------------------------------------------|
|                                                                     | <a href="#">o1HA2_mbait_RP1</a>          | <a href="#">GGCAAAAAGTGCTCCACAGGGGTTTTTCAAGGTCC</a>                 |
|                                                                     | <a href="#">o1HA2_mbait_FP1</a>          | <a href="#">CTTGAAAAACCCCTGTGGAGCACTTTTTTGCCGT</a>                  |
|                                                                     | <a href="#">c2o1_mbait_RP1</a>           | <a href="#">CAAGCTATGCATCAAGCTTGGTACCCTC</a>                        |
| Incorporation of <i>col10a1</i> wobble bases                        | <a href="#">pA_Col10a1_e2wob_FP</a>      | <a href="#">GGGAGGTGTGGGAGGTTTTTCTGCACTTTCTCTGGGTTCTGATTGC</a>      |
|                                                                     | <a href="#">Col10a1e2endwob_RP</a>       | <a href="#">AAAACCGGAAAACGTACAATGTACATTCTCAGCAGCAAA GACACCATTGG</a> |
| Incorporation of <i>col2a1a</i> wobble bases                        | <a href="#">c2wob_FP1</a>                | <a href="#">AAAACCTCACGCTTGCCCATAGTCGAC</a>                         |
|                                                                     | <a href="#">c2wob_RP1</a>                | <a href="#">GTCGACTATGGGCAAGCGTGAGGTTTT</a>                         |
| Incorporation of <i>osr1</i> wobble bases                           | <a href="#">o1wob_FP1</a>                | <a href="#">TTTGCTGCGATCAGCACAGGTGGGTCA</a>                         |
|                                                                     | <a href="#">o1wob_RP1</a>                | <a href="#">TGACCCACCTGTGCTGATCGCAGCAAA</a>                         |
| Genotyping of <i>col10a1</i> <sup>p2a-CreERT2</sup> medaka          | <a href="#">Col10a1_e2_1481_FP (FP1)</a> | <a href="#">GGCAGCCCCATTAAGTTCGACC</a>                              |
|                                                                     | <a href="#">CreERT2_81_RP (RP1)</a>      | <a href="#">GGCGATCCCTGAACATGTCCAT</a>                              |
|                                                                     | <a href="#">Col10a1_i2_244_RP (RP2)</a>  | <a href="#">TGTCTCCGTTACAAAAGGTCACCG</a>                            |
| Sequencing of <i>col10a1</i> knock-in at 3' and 5' homology regions | <a href="#">Col10a1_e2_1481_FP</a>       | <a href="#">GGCAGCCCCATTAAGTTCGAC</a>                               |
|                                                                     | <a href="#">CreERT2_81_RP</a>            | <a href="#">GGCGATCCCTGAACATGTCCAT</a>                              |
|                                                                     | <a href="#">Col10a1_i2_244_RP</a>        | <a href="#">TGTCTCCGTTACAAAAGGTCACCG</a>                            |
|                                                                     | <a href="#">GFP_66_RP</a>                | <a href="#">GTCGCCGTCCAGCTCGACCA</a>                                |
| Sequencing of <i>col2a1a</i> knock-in at 3' and 5' homology regions | <a href="#">c2a1a_i53_FP (FP1)</a>       | <a href="#">AAGGGCCATCTTCTGAGTGGA</a>                               |
|                                                                     | <a href="#">CreERT2_81_RP (RP1)</a>      | <a href="#">GGCGATCCCTGAACATGTCCAT</a>                              |
|                                                                     | <a href="#">col2a1_end_RP1 (RP2)</a>     | <a href="#">AACTTGGTTTGCTTGGTCCCT</a>                               |
|                                                                     | <a href="#">GFP_66_RP (FP2)</a>          | <a href="#">GTCGCCGTCCAGCTCGACCA</a>                                |
| Sequencing of <i>osr1</i> knock-in at 3' and 5' homology regions    | <a href="#">osr1_i1_1296_FP (FP1)</a>    | <a href="#">TTGCACTGGAGAAGGGGTTTAG</a>                              |
|                                                                     | <a href="#">CreERT2_81_RP (RP1)</a>      | <a href="#">GGCGATCCCTGAACATGTCCAT</a>                              |
|                                                                     | <a href="#">osr1_end_RP1 (RP2)</a>       | <a href="#">TGGCTTTGATCATTCTGGGGC</a>                               |
|                                                                     | <a href="#">GFP_66_RP (FP2)</a>          | <a href="#">GTCGCCGTCCAGCTCGACCA</a>                                |

[Click here to download Table S1](#)

**Table S2. Sequence of guide RNAs (gRNAs).**

| Name                | Sequence (5' – 3')                      |
|---------------------|-----------------------------------------|
| mbait gRNA          | <a href="#">CCACCTCTGGAACCGCAGCAGCC</a> |
| <i>col10a1</i> gRNA | <a href="#">CCACTGCACTTTCTCTGGGTTCC</a> |
| <i>osr1</i> gRNA    | <a href="#">TGACACACGTTTGCTGAGCGCGG</a> |
| <i>col2a1a</i> gRNA | <a href="#">AACATCCCGCCTGCCAATCGTGG</a> |

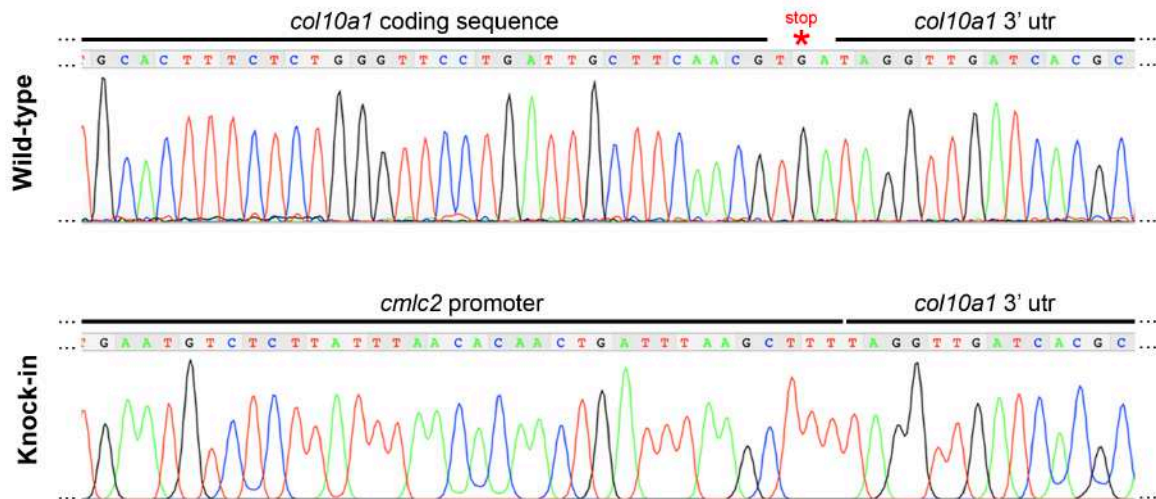

**Fig. S1. DNA sequencing confirms precise knock-in at the 3' homology region in *col10a1*<sup>p2a-CreERT2</sup> medaka.** In *col10a1*<sup>p2a-CreERT2</sup> medaka, *cmlc2* promoter sequence begins immediately upstream of the *col10a1* 3' untranslated region (utr).

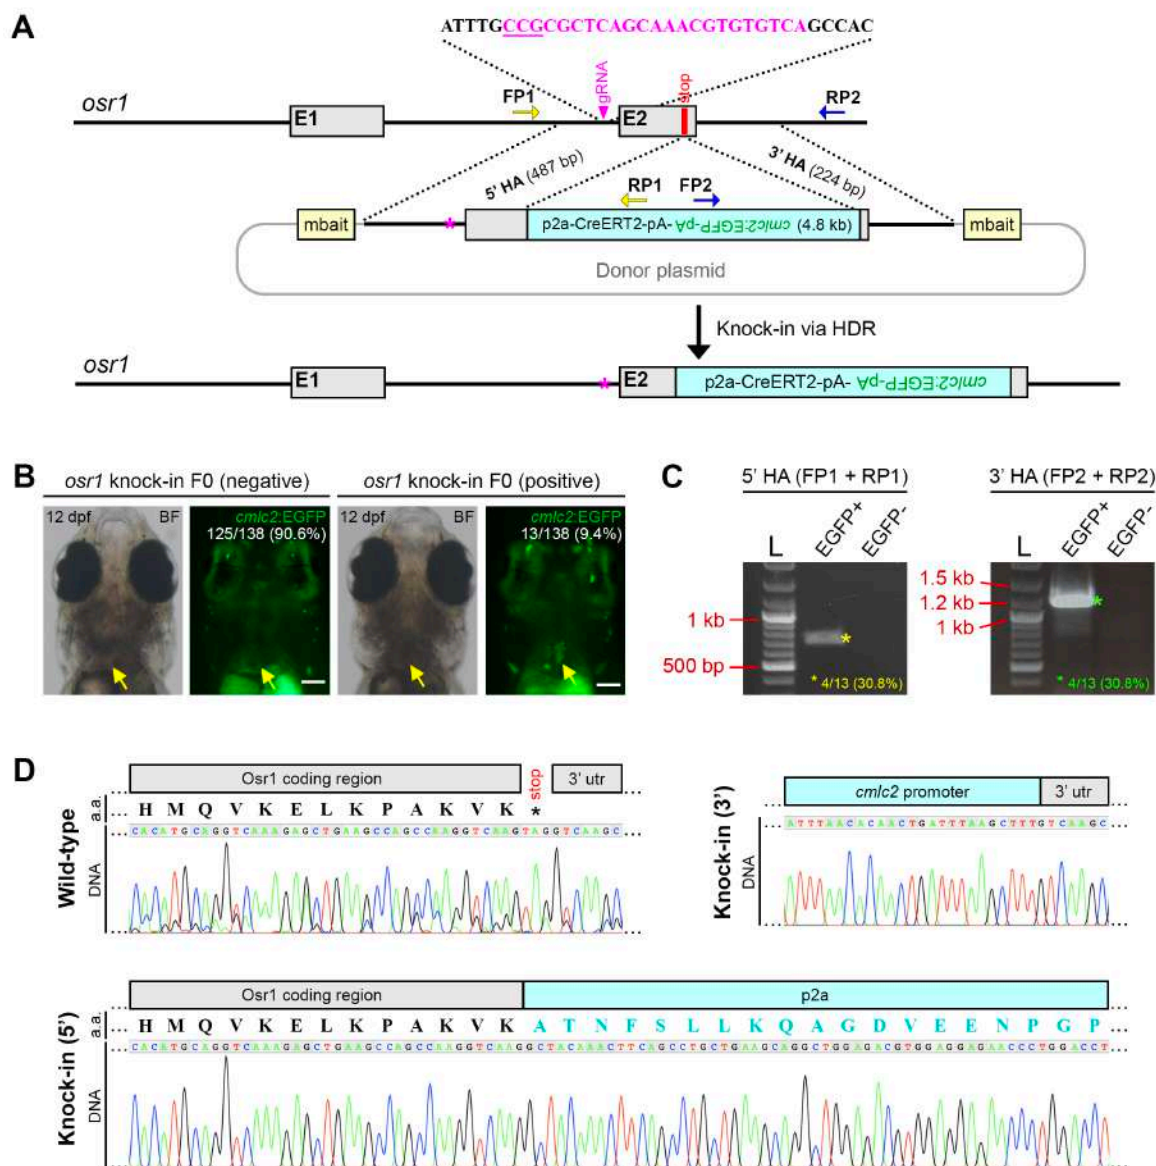

**Fig. S2. Knock-in of p2a-CreERT2;*cmlc2*:EGFP into the medaka *osr1* locus using CRISPR/Cas9 and homology-directed repair (HDR).**

**A.** Strategy for knock-in of p2a-CreERT2;*cmlc2*:EGFP into the *osr1* locus. A gRNA targeting *osr1* (indicated in magenta; PAM sequence underlined) was designed. A donor plasmid containing two mbait gRNA sites (yellow boxes) and two *osr1* homology arms (5' HA and 3' HA, 487 bp and 224 bp, respectively) flanking the p2a-CreERT2;*cmlc2*:EGFP sequence was used. Magenta asterisks indicate wobble bases incorporated at the *osr1* gRNA site. The endogenous *osr1* stop codon is indicated in red. Yellow arrows (FP1, RP1) and blue arrows (FP2, RP2) indicate primer pairs used for identification of precise knock-in at the 5' HA and 3' HA, respectively. **B.** Stereomicroscope fluorescent images showing *osr1* knock-in injected embryos (F0) with no

*cmhc2:EGFP* expression (left panel, yellow arrows; 125 out of 138 injected embryos) or mosaic *cmhc2:EGFP* expression (right panel, yellow arrows; 13 out of 138 injected embryos) in the heart. Scale bars: 100  $\mu\text{m}$ . **C.** DNA agarose gel images showing PCR-genotyping of *cmhc2:EGFP*-positive (EGFP+) and *cmhc2:EGFP*-negative (EGFP-) larvae (F0) using the primer pairs as indicated in A. Yellow and green asterisks indicate the expected 712 bp and 1.2 kb, respectively. L, DNA ladder. Expected bands at the 5' and 3' homology regions were observed in 4 out of 13 EGFP+ larvae (30.8%). **D.** DNA sequencing of the 5' and 3' bands as shown in C (yellow and green asterisks, respectively) revealed precise knock-in at the *osr1* locus. Black asterisk indicates the endogenous *osr1* stop codon. a.a., amino acid.

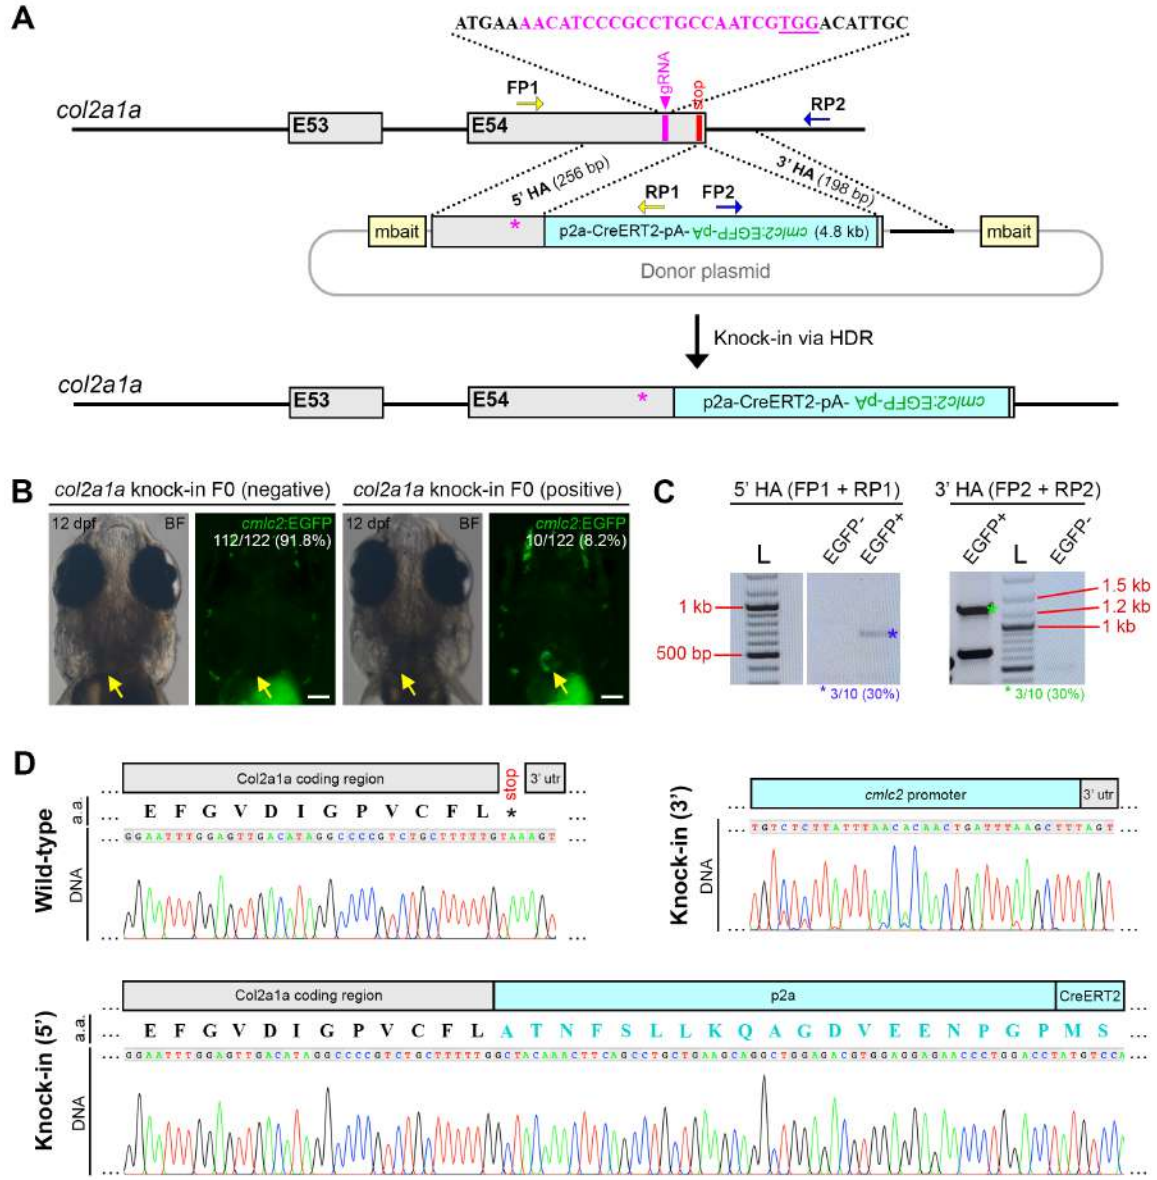

**Fig. S3. Knock-in of p2a-CreERT2;*cmIc2*:EGFP into the medaka *col2a1a* locus using CRISPR/Cas9 and homology-directed repair (HDR).**

**A.** For knock-in of p2a-CreERT2;*cmIc2*:EGFP into the *col2a1a* locus, a gRNA targeting *col2a1a* (indicated in magenta; PAM sequence underlined) was designed. A donor plasmid containing two mbait gRNA sites (yellow boxes) and two *col2a1a* homology arms (5' HA and 3' HA, 256 bp and 198 bp, respectively) flanking the p2a-CreERT2;*cmIc2*:EGFP sequence was used. Magenta asterisks indicate wobble bases incorporated at the *col2a1a* gRNA site. The endogenous *col2a1a* stop codon is indicated in red. Yellow arrows (FP1, RP1) and blue arrows (FP2, RP2) indicate primer pairs used for identification of precise knock-in at the 5' HA and 3' HA, respectively. **B.** Stereomicroscope fluorescent images showing *col2a1a* knock-in injected embryos with no *cmIc2*:EGFP expression (left panel, yellow arrows; 112 out of 122 injected embryos) or mosaic *cmIc2*:EGFP expression (right panel, yellow arrows; 10 out of 122 injected embryos) in the heart. Scale bars: 100  $\mu$ m. **C.** DNA agarose gel images showing PCR-genotyping of *cmIc2*:EGFP-positive (EGFP+) and *cmIc2*:EGFP-negative (EGFP-) larvae (F0) using the primer pairs as indicated in A. Blue and green asterisks indicate the expected 612 bp and 1279 bp, respectively. L, DNA ladder. Expected bands at the 5' and 3' homology regions were observed in 3 out of 10 EGFP+ larvae (30%). **D.** DNA sequencing of the 5' and 3' bands as shown in C (blue and green asterisks, respectively) revealed precise knock-in at the *col2a1a* locus. Black asterisk indicates the endogenous *osr1* stop codon. a.a., amino acid.

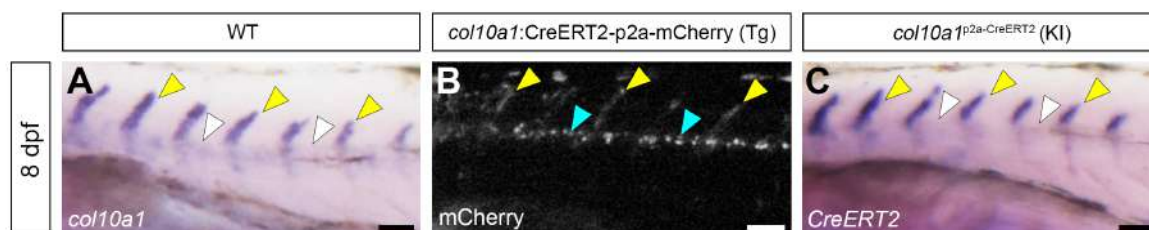

**Fig. S4. Expression of endogenous *col10a1*, transgenic *col10a1*:CreERT2-p2a-mCherry and *CreERT2* in the *col10a1*<sup>p2a-CreERT2</sup> knock-in line at the medaka vertebral column.** Lateral view of the 8 dpf medaka trunk showing whole-mount RNA *in situ* hybridization (WISH) of *col10a1* in wild-type (WT) medaka (A), mCherry fluorescence in *col10a1*:CreERT2-p2a-mCherry transgenic (Tg) medaka (B) and WISH of *CreERT2* in *col10a1*<sup>p2a-CreERT2</sup> knock-in (KI) medaka (C). Yellow arrows in A-C indicate expression in neural arches. Cyan arrows in B indicate expression in spinal cord neurons. White arrows in A, C indicate absence of expression in spinal cord neurons. Scale bars: 50  $\mu$ m.



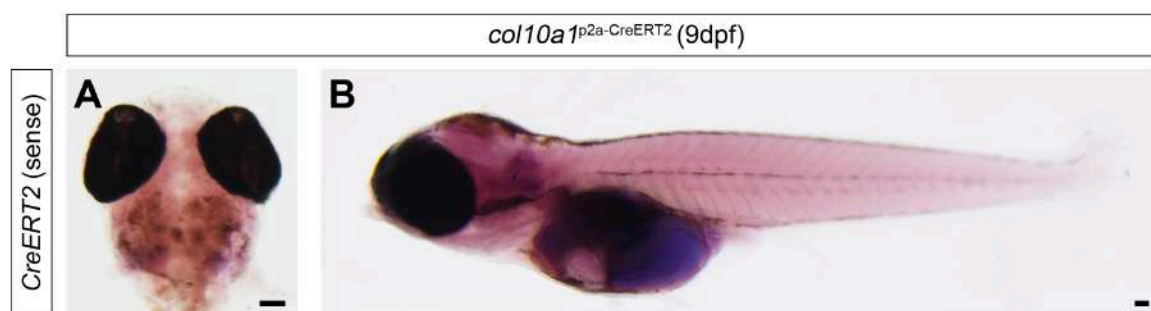

**Fig. S5.** Whole-mount RNA *in situ* hybridization using *CreERT2* sense riboprobes on 9 dpf *col10a1<sup>p2a-CreERT2</sup>* larvae. No specific staining was observed in the head (A, ventral view), trunk and caudal fin (B, lateral view). Scale bars: 100  $\mu$ m.

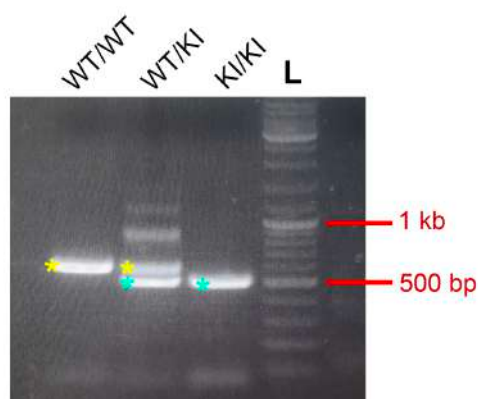

**Fig. S6.** DNA agarose gel showing genotyping of heterozygous *col10a1<sup>p2a-CreERT2</sup>* (WT/KI), homozygous *col10a1<sup>p2a-CreERT2</sup>* (KI/KI) and a wild-type sibling (WT/WT). Genotyping was performed via PCR using the primers indicated in Fig. 1 (FP1, RP1 and RP2). For WT/WT, a single 596 bp band was observed (yellow asterisk on the first lane). For KI/KI, a single 505 bp band was observed (cyan asterisk on the third lane). For WT/KI, both the 596 and 505 bp bands were observed (yellow and cyan asterisks, respectively). L, DNA ladder.

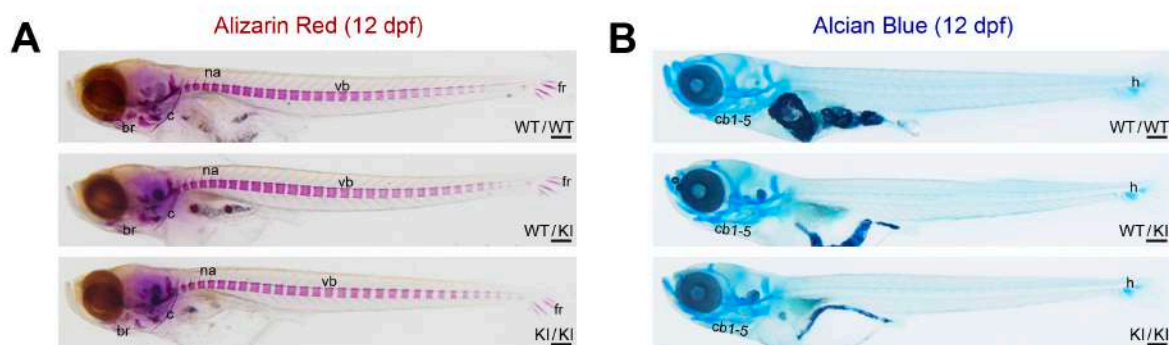

**Fig. S7.** Alizarin Red bone staining and Alcian Blue cartilage staining on 12 dpf heterozygous *col10a1*<sup>p2a-CreERT2</sup> (WT/KI), homozygous *col10a1*<sup>p2a-CreERT2</sup> (KI/KI) and WT siblings (WT/WT). Bone (A) and cartilage (B) formation were normal in WT/KI and KI/KI larvae compared to WT/WT controls. Images show the lateral view. br, branchiostegal ray. cb1-5, ceratobranchials 1-5. c, cleithrum. fr, fin ray. h, hypural. na, neural arch. vb, vertebral body. Scale bars: 200 µm.

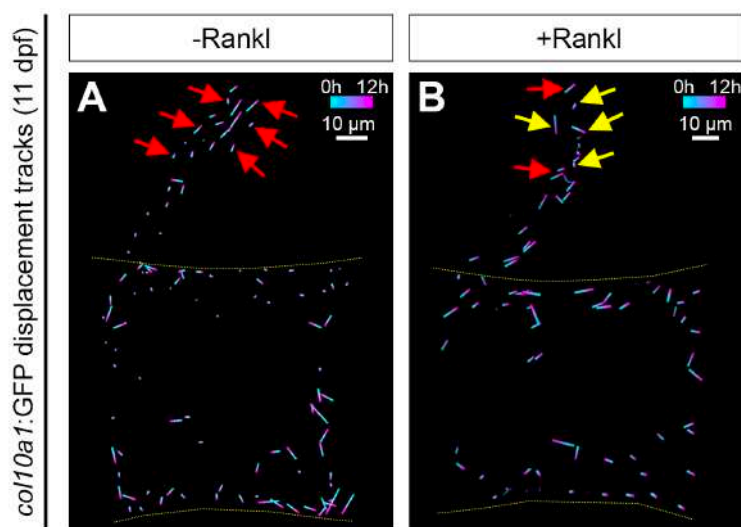

**Fig. S8.** Displacement tracks of *col10a1*:GFP cells in a vertebra of the vertebral column in non-Rankl and Rankl-induced conditions at 11 dpf. Tracks were generated from a 12 h time-lapse videos at 11 dpf in the absence of Rankl induction (A) or 2 days after Rankl induction (B). Yellow dotted lines demarcate the vertebral body. Arrows indicate *col10a1*:GFP cells at the neural arch. Yellow arrows indicate cells migrating ventrally (towards the vertebral body). Red arrows indicate cells migrating dorsally (away from the vertebral body). Scale bar: 10 µm.

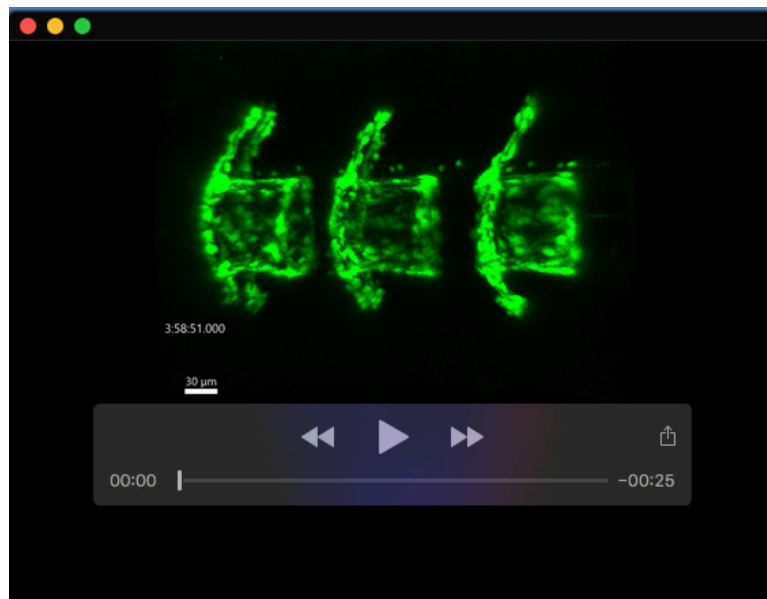

**Movie 1.** Time-lapse video showing *col10a1*:GFP osteoblast progenitors in medaka vertebral column beginning at 11 dpf. Time-lapse duration: 12 hours. Scale bar: 30 µm.
